# Supplementary material for: Integration of protein L-immobilized epoxy magnetic bead capture with LC-MS/MS for therapeutic monoclonal antibody quantification in serum
Source: Royal Society of Chemistry journal article supplement (doi:10.1039/d4ay00433g), 2024-01-01
Supplement: d4ay00433g2.pdf [file d4ay00433g2.pdf]

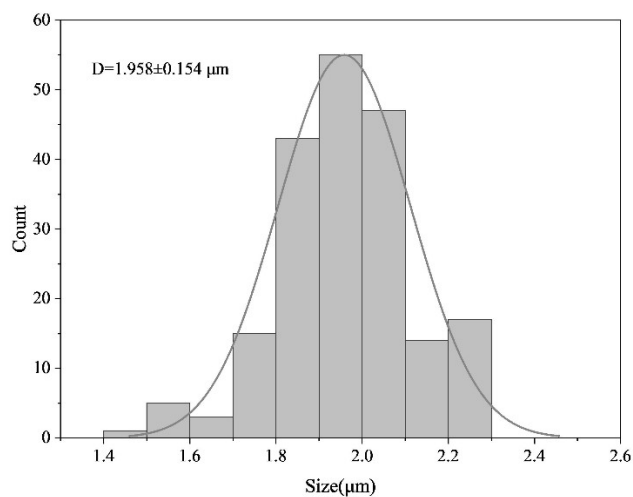

**Fig. S1** Size distribution curve of pGMA beads

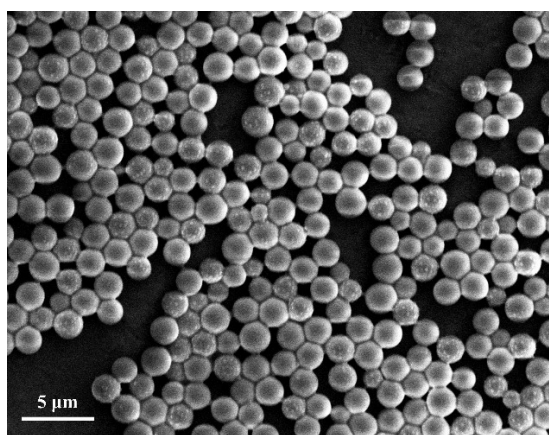

**Fig. S2** SEM image of pGMA beads



**Table S2** Dilution integrity results of the analytes in mouse serum

| Dilution<br>Ratio | Daratumumab               |                           | Pembrolizumab             |                           |
|-------------------|---------------------------|---------------------------|---------------------------|---------------------------|
|                   | Spiked                    | Measured                  | Spiked                    | Measured                  |
|                   | Conc.( $\mu\text{g/mL}$ ) | Conc.( $\mu\text{g/mL}$ ) | Conc.( $\mu\text{g/mL}$ ) | Conc.( $\mu\text{g/mL}$ ) |
| 10                | 100                       | 106                       | 100                       | 107                       |
|                   |                           | 104                       |                           | 109                       |
|                   |                           | 104                       |                           | 108                       |
|                   |                           | 101                       |                           | 106                       |
|                   |                           | 107                       |                           | 109                       |
|                   |                           | 104                       |                           | 106                       |
| Mean              |                           | 104                       |                           | 108                       |
| SD                |                           | 1.94                      |                           | 1.35                      |
| %CV               | -                         | 1.9                       | -                         | 1.3                       |
| %RE               |                           | 4.4                       |                           | 7.5                       |

**Table S3** Carry-over results of analytes in mouse serum

|               | Residual peak area | LLOQ peak area | Carry over (%) |
|---------------|--------------------|----------------|----------------|
| Daratumumab   | 1.22E+03           |                | 3.0            |
|               | 2.17E+03           |                | 5.3            |
|               | 1.85E+03           | 4.08E+04       | 4.5            |
|               | 1.25E+03           |                | 3.1            |
|               | 1.85E+03           |                | 4.5            |
|               | 2.29E+03           |                | 5.6            |
| 2.98E+03      | 3.7                |                |                |
| 3.69E+03      | 4.5                |                |                |
| Pembrolizumab | 3.52E+03           | 8.15E+04       | 4.3            |
|               | 2.10E+03           |                | 2.6            |
|               | 4.56E+03           |                | 5.6            |
|               | 2.83E+03           |                | 3.5            |
|               | 4.09E+02           |                | 0.6            |
|               | 5.68E+02           |                | 0.8            |
| Rituximab     | 4.28E+02           | 7.37E+04       | 0.6            |
|               | 4.83E+02           |                | 0.7            |
|               | 4.80E+02           |                | 0.7            |
|               | 4.43E+02           |                | 0.6            |
