# Supplementary material for: Integration of protein L-immobilized epoxy magnetic bead capture with LC-MS/MS for therapeutic monoclonal antibody quantification in serum
Source: Royal Society of Chemistry journal article supplement (doi:10.1039/d4ay00433g), 2024-01-01
Supplement: d4ay00433g7.pdf [file d4ay00433g7.pdf]

| Relative Ratio | Reference     |                        | Footnote (cont.) |                        |
|----------------|---------------|------------------------|------------------|------------------------|
|                | System        | Measured Conc. (µg/ml) | System           | Measured Conc. (µg/ml) |
|                | Conc. (µg/ml) |                        | Conc. (µg/ml)    |                        |
| 100            | 100           | 100                    | 100              | 100                    |
|                |               | 101                    |                  | 100                    |
|                |               | 102                    |                  | 100                    |
|                |               | 103                    |                  | 100                    |
|                |               | 104                    |                  | 100                    |
|                |               | 105                    |                  | 100                    |
| Mean           |               | 104                    |                  | 100                    |
| SD             |               | 1.04                   |                  | 1.00                   |
| 100%           |               | 1.0                    |                  | 1.0                    |
| 100%           |               | 1.0                    |                  | 1.0                    |
