# Supplementary material for: Integration of protein L-immobilized epoxy magnetic bead capture with LC-MS/MS for therapeutic monoclonal antibody quantification in serum
Source: Royal Society of Chemistry journal article supplement (doi:10.1039/d4ay00433g), 2024-01-01
Supplement: d4ay00433g8.pdf [file d4ay00433g8.pdf]

|                    | Method 1 peak area | Method 2 peak area | Error (area-%) |
|--------------------|--------------------|--------------------|----------------|
| Chloroacetaldehyde | 1.220E+03          |                    | 5.8            |
|                    | 2.070E+03          |                    | 5.0            |
|                    | 1.690E+03          | 4.890E+04          | 4.9            |
|                    | 1.250E+03          |                    | 9.1            |
|                    | 1.890E+03          |                    | 8.8            |
|                    | 2.290E+03          |                    | 5.6            |
| Formaldehyde       | 2.990E+03          |                    | 9.7            |
|                    | 3.690E+03          |                    | 4.9            |
|                    | 3.520E+03          | 8.190E+04          | 4.9            |
|                    | 2.090E+03          |                    | 2.6            |
|                    | 4.560E+03          |                    | 5.6            |
|                    | 2.830E+03          |                    | 9.8            |
| Benzaldehyde       | 4.690E+02          |                    | 9.6            |
|                    | 5.690E+02          |                    | 9.8            |
|                    | 4.290E+02          | 7.370E+04          | 9.8            |
|                    | 4.890E+02          |                    | 9.7            |
|                    | 4.690E+02          |                    | 9.7            |
|                    | 4.430E+02          |                    | 9.6            |
