# Supplementary figures and images for: Integration of protein L-immobilized epoxy magnetic bead capture with LC-MS/MS for therapeutic monoclonal antibody quantification in serum
Source: Royal Society of Chemistry journal article supplement (doi:10.1039/d4ay00433g), 2024-01-01

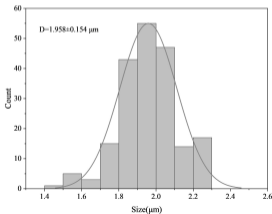

Supplement: d4ay00433g4.pdf [file d4ay00433g4.pdf]

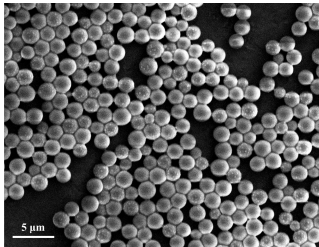

Supplement: d4ay00433g5.pdf [file d4ay00433g5.pdf]
